# Supplementary material for: Solvothermal reduction synthesis and characterization of superparamagnetic magnetite nanoparticlesElectronic supplementary information (ESI) available: size distributions of samples modified with TOPO + PVP, HDA + PVP, and PVP only. See http://www.rsc.org/suppdata/jm/b3/b305526d/
Source: Royal Society of Chemistry journal article supplement (doi:10.1039/b305526d), 2003-01-01
Supplement: b305526d.pdf [file b305526d.pdf]

---

# Solvothermal reduction synthesis and characterization of superparamagnetic magnetite nanoparticles

---

Yanglong Hou, Junfeng Yu and Song Gao\*

## Supporting information

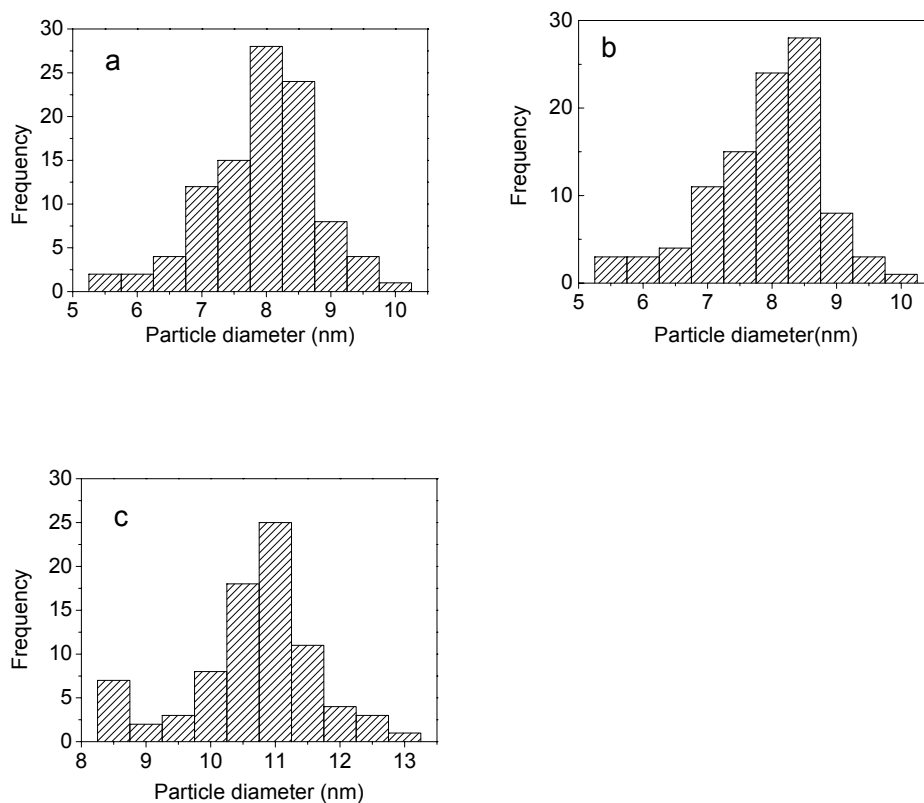

The size distribution of samples (a) modified with TOPO and PVP, (b) modified with HDA and PVP, (c) modified with PVP only.
